# Supplementary material for: Dispersal in microbes: fungi in indoor air are dominated by outdoor air and show dispersal limitation at short distances
Source: PubMed Central journal article supplement — ISME J. 2013 Feb 21;7(7):1262–73. doi: 10.1038/ismej.2013.28 (PMC3695294; doi:10.1038/ismej.2013.28), 2013-02-21
Supplement: ismej201328x1.pdf [file ismej201328x1.pdf]

## Supplementary Information

**Supplementary Figure 1** The petri dish sampling device developed to passively collect dust. The lid of an empty petri dish was suspended upside down from the ceiling of the unit, at a height of approximately 2.1 m, with monofilament fishing line (A). At the start of sampling, a fresh petri dish, with a label attached to the outer surface, was placed in the collector allowing for dust to passively settle on a sterile surface. At the end of the sampling, the dish was capped for transport and storage (B).

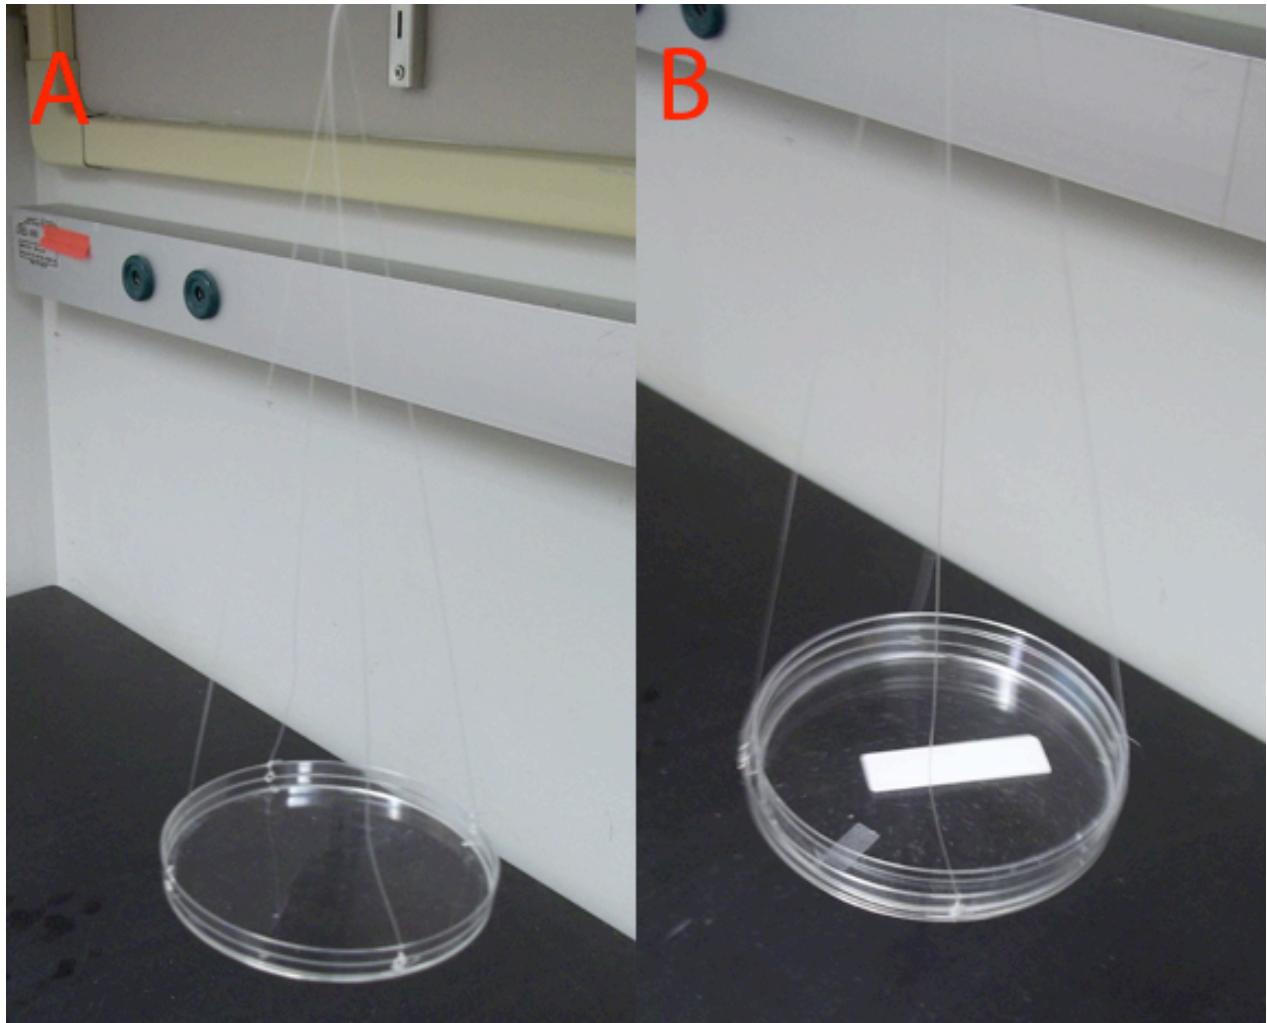

**Supplementary Figure 2** Aerial view of the housing complex in which the study was conducted. Note the small geographic scale, the uniformity of the buildings, and the variation in vegetation surrounding the complex.

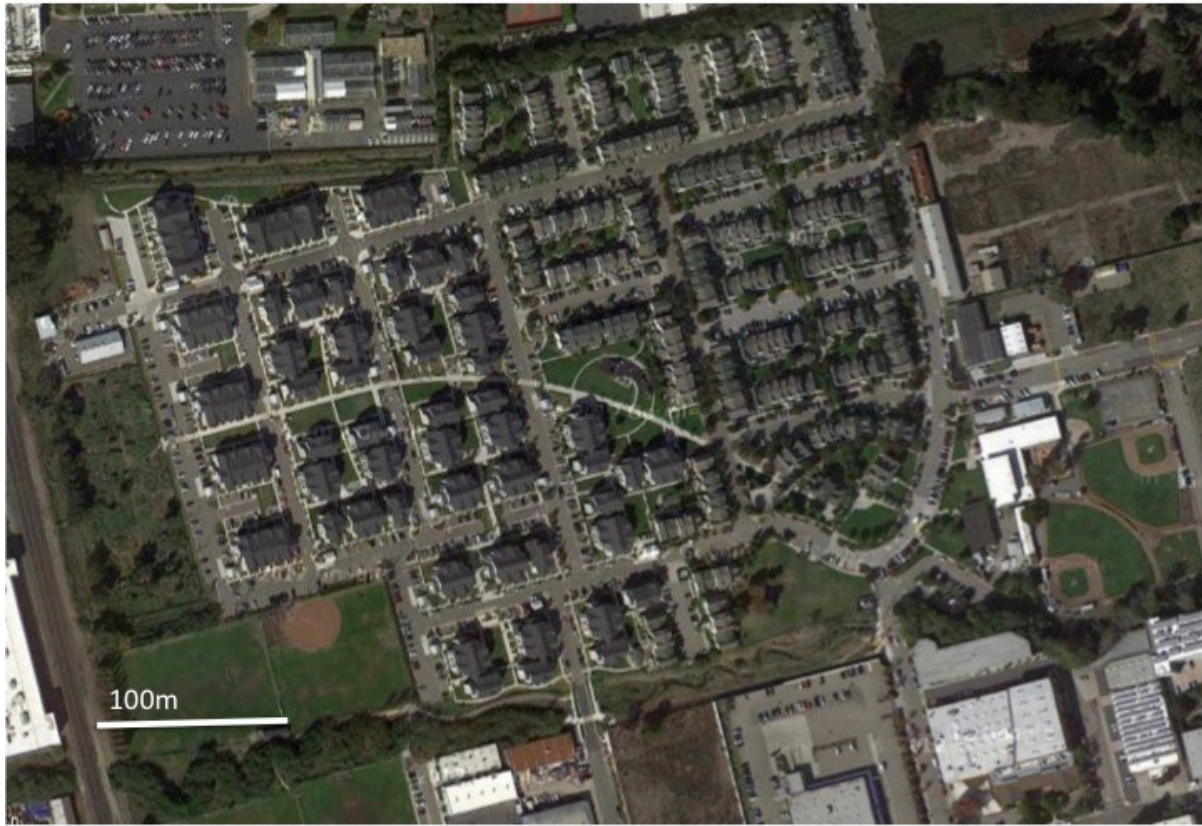

**Supplementary Figure 3** A rank “frequency” distribution of indoor air fungal OTUs. The OTUs are ranked in descending order based on how frequently they appeared in the samples, with the most frequent OTUs appearing on the left of the graph. The maximum number of samples is 84, and the most frequent OTU appeared in 80 samples. However, the vast majority of taxa appear in only a handful of samples.

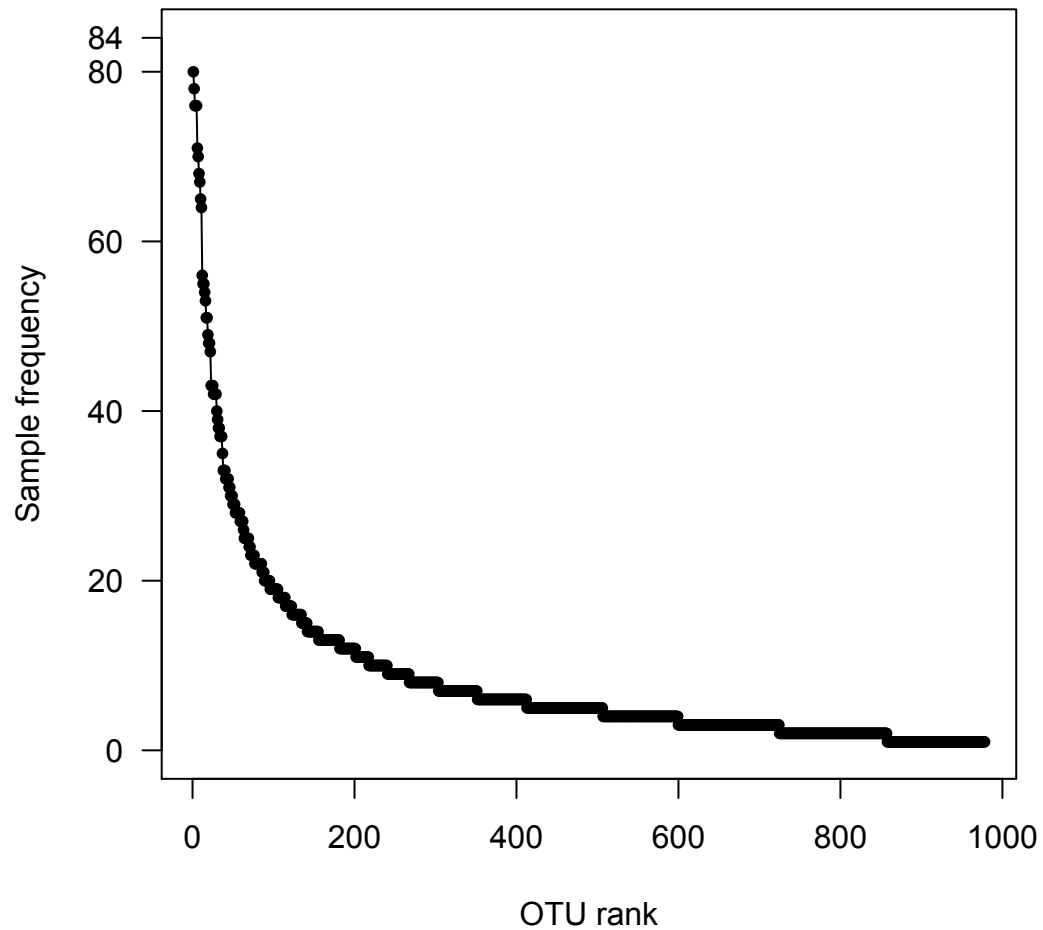

**Supplementary Figure 4** Ordination plot showing fungal community composition in two-dimensional space, using NMDS. Summer air samples are distinct from winter samples, and within a season, outdoor air samples are distinct from indoor ones.

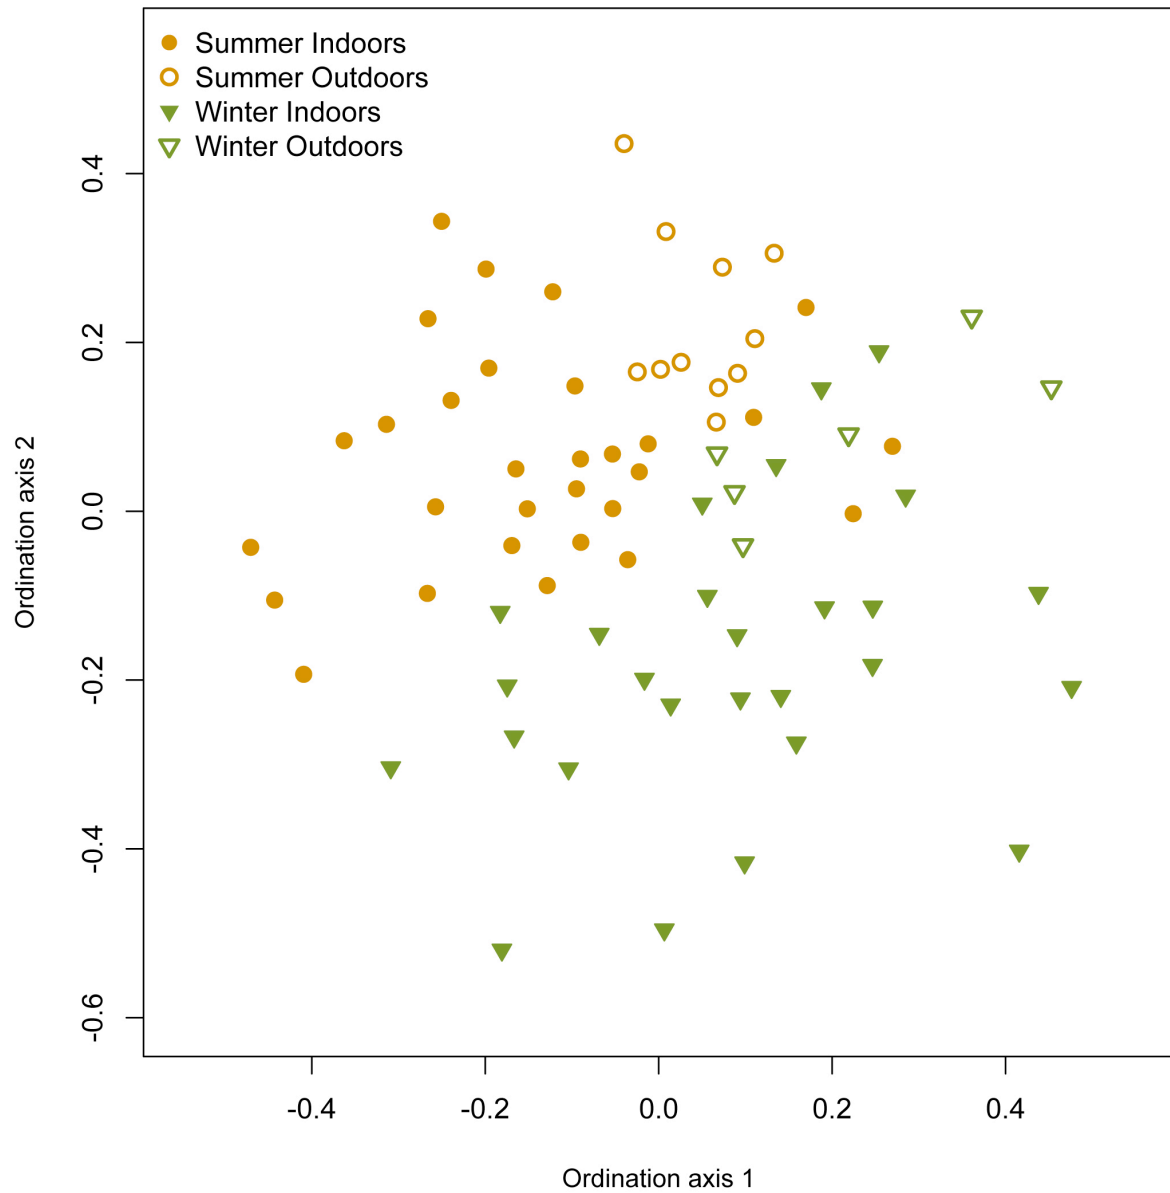

**Supplementary Figure 5** Fungal biomass as determined by qPCR, represented as *Penicillium spinulosum* spore equivalents, across different sampling locations. The top plot shows all the samples with a common y-axis, and the bottom plot zooms to the indoor samples exclusively. As with results of diversity from community composition, fungal biomass is greater outdoors than indoors, is greater outdoors in winter than summer, and is largely indistinguishable among indoor rooms.

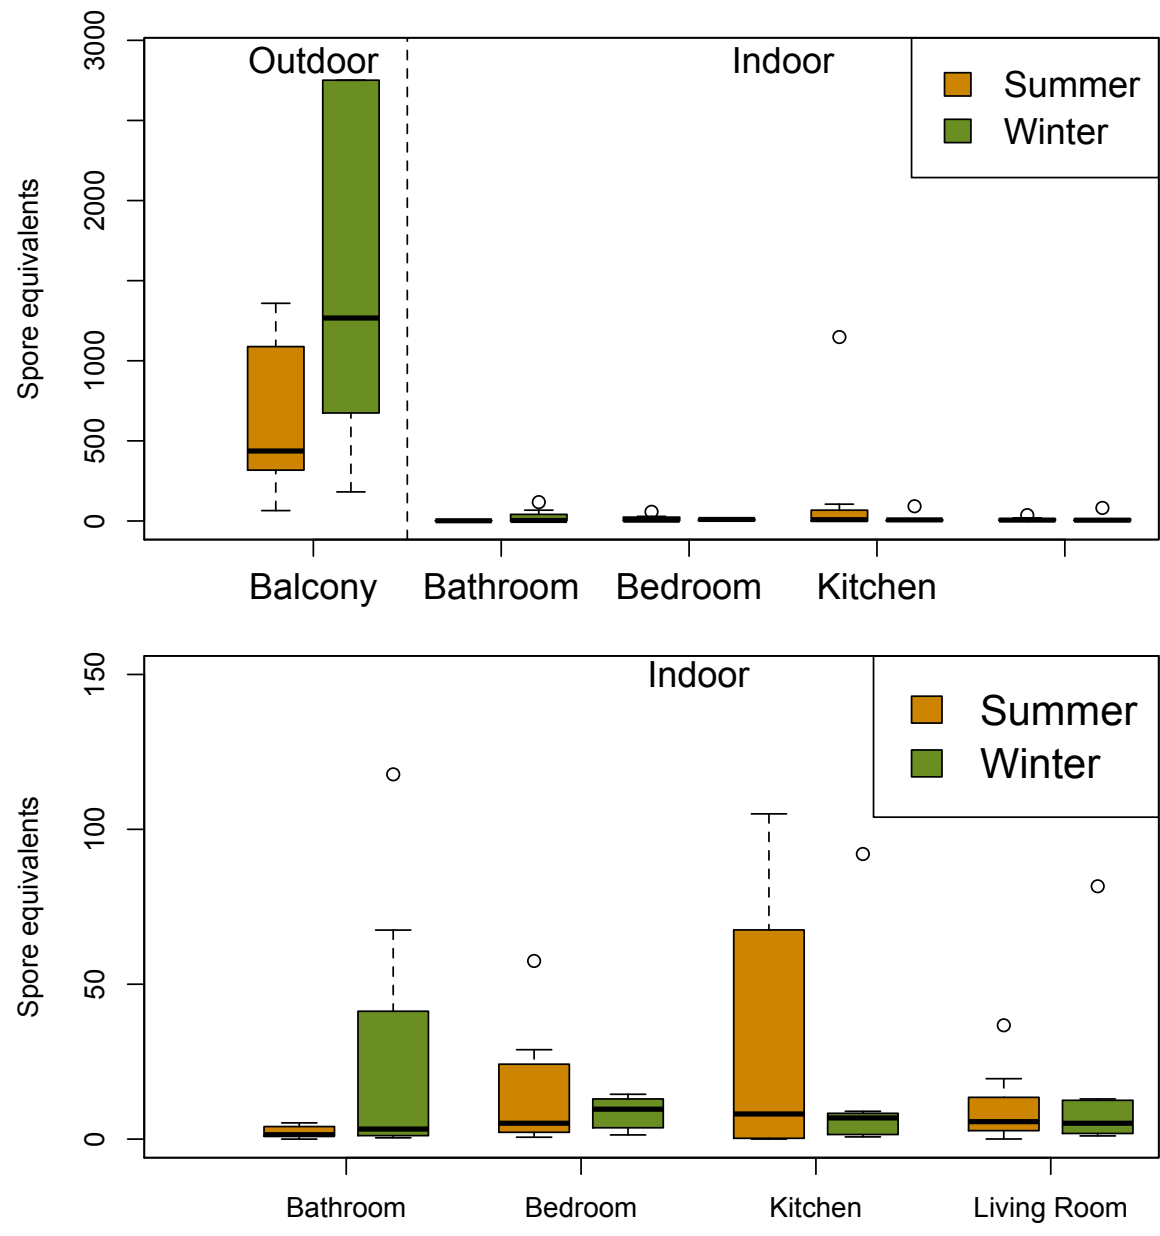

**Supplementary Figure 6** The observed distance between outdoor and indoor samples for each unit in summer, in comparison with simulated distances from null communities. The density of (n=999) simulated community distances (based on the  $\beta_{sim}$ ) between outdoor and indoor samples are graphed and the 2.5 and 97.5 quartiles labeled with dash lines. The observed distance between outdoor and indoor samples for each unit is shown with a solid line. In each case, the observed distance falls within the distribution of distances of the randomized communities.

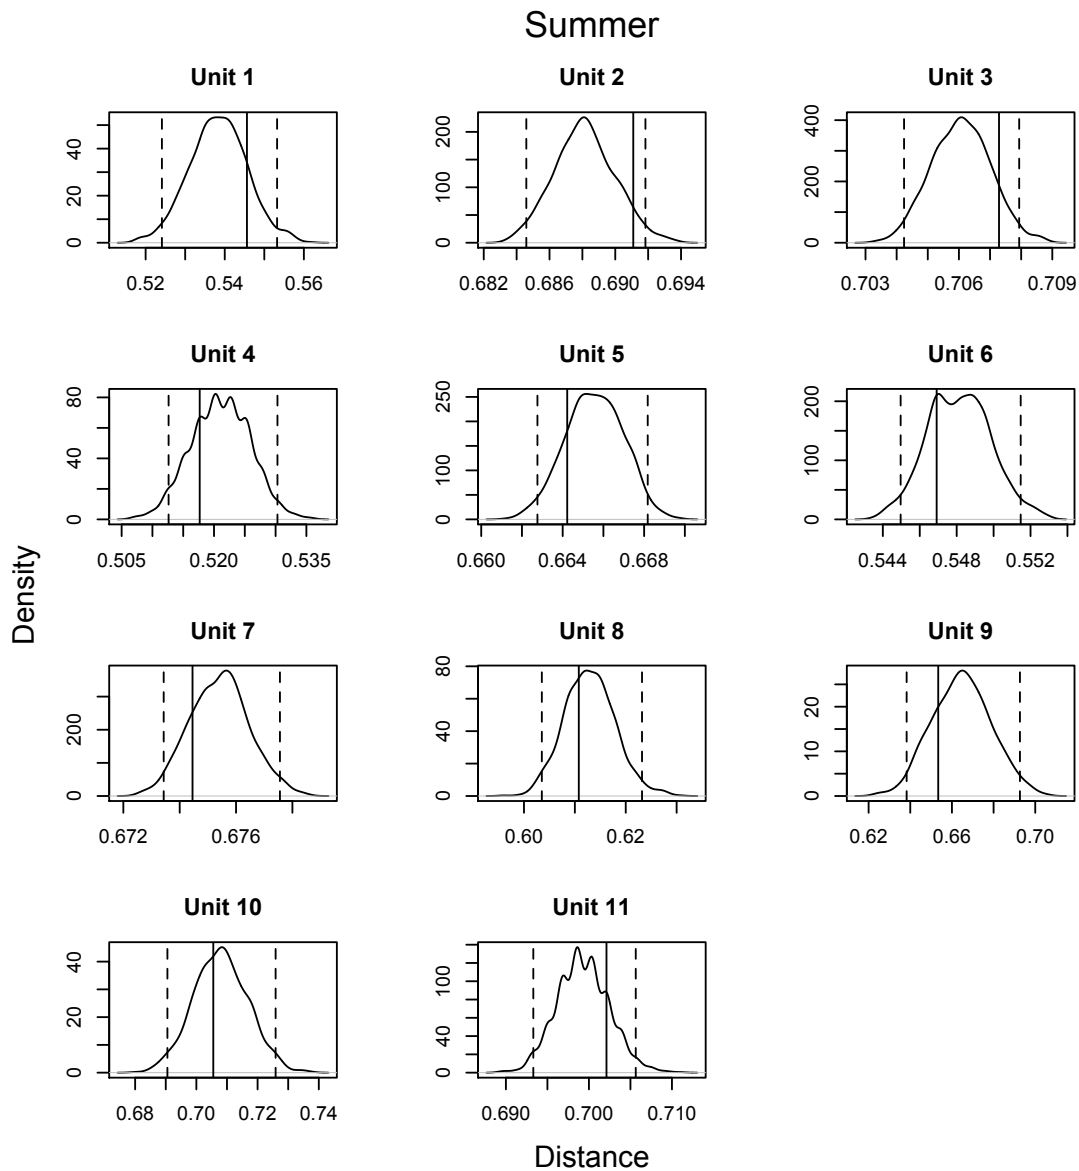

**Supplementary Figure 7** As in Supplementary Figure 5, for winter surveys. The observed distance between outdoor and indoor samples for each unit in winter, in comparison with simulated distances from null communities. The density of (n=999) simulated community distances (based on the  $\beta_{sim}$ ) between outdoor and indoor samples are graphed and the 2.5 and 97.5 quartiles labeled with dash lines. The observed distance between outdoor and indoor samples for each unit is shown with a solid line. In each case, the observed distance falls within the distribution of distances of the random communities.

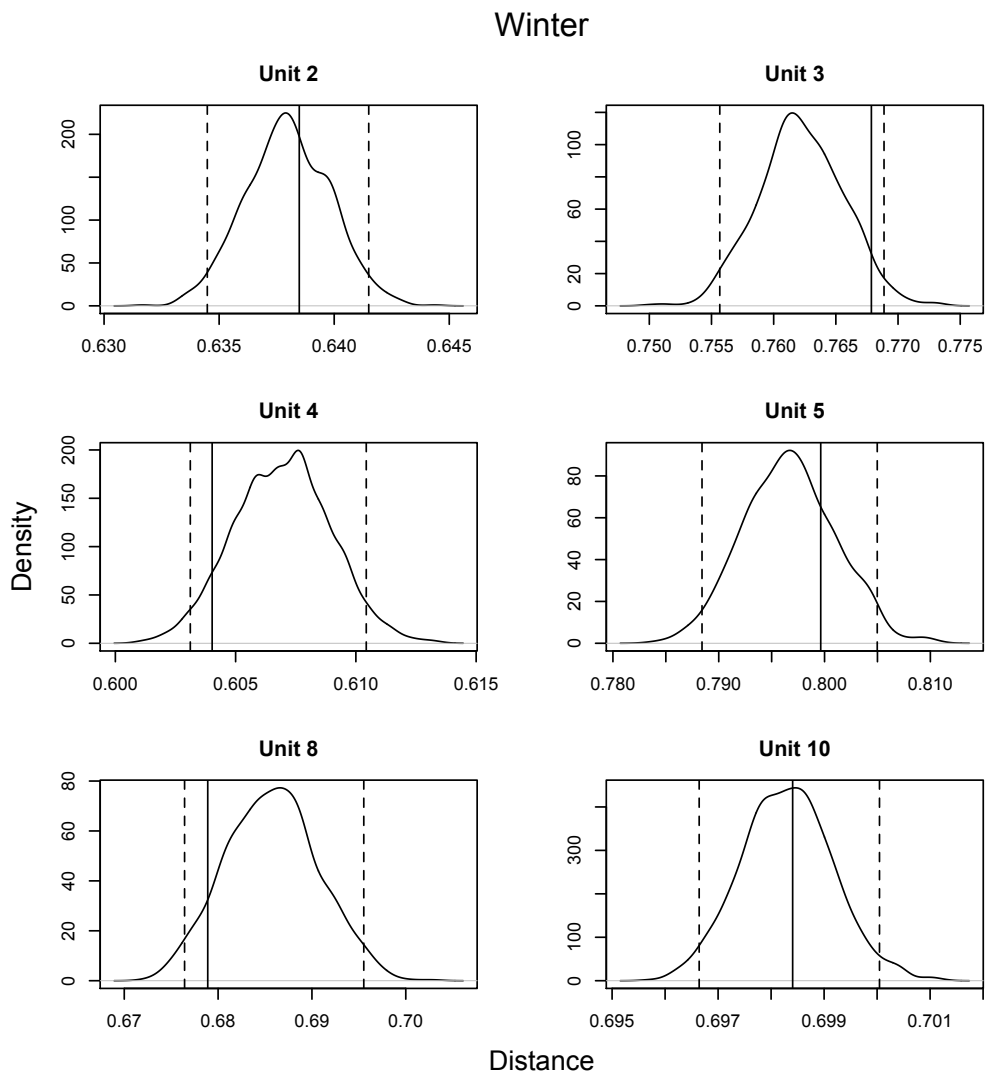

**Supplementary Table 1** Good's coverage estimating percentage of total richness detected at the used sampling depth. The final column gives the mean Good's coverage by category.

| Good's Coverage (%) | Unit | Room     | Season | Good's Coverage (%) | Unit | Room     | Season | Summary        | Mean |
|---------------------|------|----------|--------|---------------------|------|----------|--------|----------------|------|
| 33.3                | 1    | Balcony  | Summer | 34.3                | 2    | Balcony  | Winter | Summer         | 39.4 |
| 31.0                | 2    | Balcony  | Summer | 36.8                | 3    | Balcony  | Winter | Winter         | 33.8 |
| 45.9                | 3    | Balcony  | Summer | 23.9                | 4    | Balcony  | Winter |                |      |
| 37.0                | 4    | Balcony  | Summer | 36.8                | 5    | Balcony  | Winter | Summer Outdoor | 41.5 |
| 47.6                | 5    | Balcony  | Summer | 37.5                | 8    | Balcony  | Winter | Winter Outdoor | 34.1 |
| 40.5                | 6    | Balcony  | Summer | 35.0                | 10   | Balcony  | Winter |                |      |
| 51.4                | 7    | Balcony  | Summer | 28.8                | 2    | Bathroom | Winter | Summer Indoor  | 38.6 |
| 41.5                | 8    | Balcony  | Summer | 32.7                | 3    | Bathroom | Winter | Winter Indoor  | 33.7 |
| 44.4                | 9    | Balcony  | Summer | 31.6                | 4    | Bathroom | Winter |                |      |
| 40.5                | 10   | Balcony  | Summer | 27.5                | 5    | Bathroom | Winter |                |      |
| 43.5                | 11   | Balcony  | Summer | 29.4                | 7    | Bathroom | Winter |                |      |
| 35.3                | 1    | Bathroom | Summer | 29.2                | 8    | Bathroom | Winter |                |      |
| 35.7                | 2    | Bathroom | Summer | 40.5                | 10   | Bathroom | Winter |                |      |
| 40.4                | 3    | Bathroom | Summer | 25.0                | 2    | Bedroom  | Winter |                |      |
| 36.0                | 5    | Bathroom | Summer | 25.0                | 3    | Bedroom  | Winter |                |      |
| 57.1                | 6    | Bathroom | Summer | 58.1                | 4    | Bedroom  | Winter |                |      |
| 24.2                | 7    | Bathroom | Summer | 20.7                | 5    | Bedroom  | Winter |                |      |
| 29.0                | 9    | Bathroom | Summer | 26.9                | 7    | Bedroom  | Winter |                |      |
| 42.9                | 10   | Bathroom | Summer | 33.3                | 8    | Bedroom  | Winter |                |      |
| 38.2                | 11   | Bathroom | Summer | 24.1                | 10   | Bedroom  | Winter |                |      |
| 51.3                | 1    | Bedroom  | Summer | 39.5                | 11   | Bedroom  | Winter |                |      |
| 36.1                | 2    | Bedroom  | Summer | 38.9                | 2    | Kitchen  | Winter |                |      |
| 37.5                | 3    | Bedroom  | Summer | 50.0                | 3    | Kitchen  | Winter |                |      |
| 35.7                | 4    | Bedroom  | Summer | 43.3                | 5    | Kitchen  | Winter |                |      |
| 45.7                | 6    | Bedroom  | Summer | 22.4                | 7    | Kitchen  | Winter |                |      |
| 35.2                | 7    | Bedroom  | Summer | 50.0                | 8    | Kitchen  | Winter |                |      |
| 44.0                | 8    | Bedroom  | Summer | 30.6                | 10   | Kitchen  | Winter |                |      |
| 33.3                | 9    | Bedroom  | Summer | 37.8                | 2    | LR       | Winter |                |      |
| 41.0                | 11   | Bedroom  | Summer | 37.9                | 3    | LR       | Winter |                |      |
| 38.2                | 1    | Kitchen  | Summer | 31.7                | 5    | LR       | Winter |                |      |
| 41.7                | 2    | Kitchen  | Summer | 31.6                | 7    | LR       | Winter |                |      |
| 32.7                | 3    | Kitchen  | Summer | 36.7                | 10   | LR       | Winter |                |      |
| 43.1                | 5    | Kitchen  | Summer | 26.2                | 11   | LR       | Winter |                |      |
| 35.9                | 6    | Kitchen  | Summer |                     |      |          |        |                |      |
| 37.2                | 7    | Kitchen  | Summer |                     |      |          |        |                |      |
| 44.4                | 8    | Kitchen  | Summer |                     |      |          |        |                |      |
| 41.7                | 9    | Kitchen  | Summer |                     |      |          |        |                |      |
| 30.8                | 1    | LR       | Summer |                     |      |          |        |                |      |
| 32.1                | 3    | LR       | Summer |                     |      |          |        |                |      |
| 40.8                | 5    | LR       | Summer |                     |      |          |        |                |      |
| 39.5                | 10   | LR       | Summer |                     |      |          |        |                |      |
